# Supplementary material for: Bridging medical education goals and health system outcomes: An instrumental case study of pre-clerkship students’ improvement projects
Source: Perspect Med Educ. 2022 Apr 8;11(4):179–86. doi: 10.1007/s40037-022-00711-1 (PMC9391531; doi:10.1007/s40037-022-00711-1)
Supplement: Supplementary file 4 — Resource 4. Data Extraction form for HSI Project Summaries and Posters [file 40037_2022_711_MOESM4_ESM.xlsx]

## Sheet: Info to Extract
ITEM	Description	Data Entry
Project ID	Project ID	Pre-Populated
Coder 1	Coder 1 Name	Pre-Populated
Coder 2	Coder 2 Name	Pre-Populated
Project Title	Project Title	Pre-Populated
Year	Academic Year in which project was conducted	Pre-Populated
Coach	Name of coach	Pre-Populated
Project Members	Profession & # per profession	Type in
ProjectMemb_NonMD	Poster identifies more than physicians	0=No, 1=Yes
QI lead(s)	From Poster - Health or admin professionals from microsystem involved in project (other than coach)	Type in
Health System	UCSF Health, VA, ZSFGH	Type in
Microsystem	Clinical Site or Unit	Type in
No. of Students	# of students on the project	Type in
Interprof-Gap Analysis	Gap analysis involves multiple health or adminstrative professionals	0=No, 1=Yes
Interprof-Experiment	Experiment/design of intervention involves multiple health or administrative professionals	0=No, 1=Yes
Interprof-Deployment	Deployment of project involves multiple health or administrative professionals	0=No, 1=Yes
Quadruple Aims	Which Quadruple Aim(s) does the project address? Clinical care, pt experience, costs, provider experience
QA_ClinicalCare	Clinical Care	0=No, 1=Yes
QA_PatientExp	Patient Experience	0=No, 1=Yes
QA_CostofCare	Cost of Care	0=No, 1=Yes
QA_ProviderExp	Provider Experience	0=No, 1=Yes
Priority- National	Project addresses a National Priority	0=No, 1=Yes
Priority-Institutional	Proect addresses an Institutional Priority	0=No, 1=Yes
Priority- disparity	Project addresses a Disparity	0=No, 1=Yes
If disparity, which one	Identify which disparities are addresses	Type in
Benchmark- Y/N	Projet summary or Poster identifies Benchmark relevant to aim	0=No, 1=Yes
If benchmark, which one	Identify the benchmark	Type in
Project Aim 1	Stated Project Aim 1 (SMART goal)	Type in
Project Aim 2	Stated Project Aim 2 (SMART goal)	Type in
Reach - Aim 1 starting level	Starting level of performance for Aim 1	Type in
Reach- Aim 1 goal	Goal level of performance Aim 1	Type in
Aim1_NEW	Aim 1 begins at 0 (usually implementing something new)	0=no, 1=yes
Aim1_Absolute Change	Actual amount of change from baseline (in units identified)	Type in
Aim1_%Chg	% Change from baseline	Type in
Reach - Aim 2 starting level	Starting level of performance for Aim 2	Type in
Reach - Aim 2 goal	Goal level of performance Aim 2	Type in
Implementation Period	Time in months from when intervention started to final data point	Type in
Project Outcome - Aim 1	Description of project outcome for Aim 1	Type in
Project Outcome - Aim 2	Description of project outcome for Aim 2	Type in
Aim1_Achieved	Was Aim 1 Achieved?	0=No, 1=Yes
Aim2_ Achieved	Was Aim 2 Achieved?	0=No, 1=Yes
Type of Tool used for Gap Analysis, Design and Selection of Interventions	Describe all tools used (e.g. Fishbone diagram, PICK chart)	Type in
Intervention 1 - Type	Predisposing (education), enabling (in process, checklist), reinforcing (audit/feedback), other	Type in
Intervention 1 - Description	Describe the interviention	Type in
Intervention 2 - Type	Predisposing (education), enabling (in process, checklist), reinforcing (audit/feedback), other	Type in
Intervention 2 - Description	Describe the interviention	Type in
Intervention 3 - Type	Predisposing (education), enabling (in process, checklist), reinforcing (audit/feedback), other	Type in
Intervention 3 - Description	Describe the interviention	Type in
Intervention 4 - Type	Predisposing (education), enabling (in process, checklist), reinforcing (audit/feedback), other	Type in
Intervention 4 - Description	Describe the interviention	Type in
IntType_Predisposing	Interventions described as Pre-disposing	0=No, 1=Yes
IntType_Enabling	Interventions described as Enabling	0=No, 1=Yes
IntType_Reinforcing	Interventions described as Reinforcing	0=No, 1=Yes
Intervention implementation	full, partial, absent
Imp_Full	Full implementation of Intervention	0=No, 1=Yes
Imp_Partial	Partial implementation of intervention	0=No, 1=Yes
Imp_None	No implementation of intervention	0=No, 1=Yes
Facilitators to success	Write in key factors described in project summary and poster	Type in
Barriers to success	Write in key factors described in project summary and poster	Type in
NOTES
